# Supplementary material
Source: Research Square preprint supplement (doi:10.21203/rs.3.rs-9195507/v1)

# Supplementary Tables

Table 1: siRNA and dsRNA

| No. | Target        | Length | Sequence                                                                                                                                                                                                                                                                                                                                                                             |
|-----|---------------|--------|--------------------------------------------------------------------------------------------------------------------------------------------------------------------------------------------------------------------------------------------------------------------------------------------------------------------------------------------------------------------------------------|
| 1   | <i>GFP</i>    | 22     | /5Phos/UUUCCGUAUGUUGCAUCACCUmU<br>/5Phos/GGUGAUGCAACAUACGGAAAAmC                                                                                                                                                                                                                                                                                                                     |
| 2   | <i>NbChlH</i> | 22     | /5Phos/UUUGCCUCCA AUUCCAUGAUCmA<br>/5Phos/AUCAUGGAAUUGGAGGCCAAAAmG                                                                                                                                                                                                                                                                                                                   |
| 3   | <i>SflAP</i>  | 22     | UUUAGCCUCAAGCGAUCCGCUC<br>GCGGAUCGCUUGAGGCCUAAAAU                                                                                                                                                                                                                                                                                                                                    |
| 4   | <i>SflAP</i>  | 300    | CAAUGGCUCUCCUCAACAUAUAAACGCUAUUCAAGAGCGGAUCG<br>CUUGAGGCCUAAAAUUCGACCUCUCGCGCCACUAAUGCUGCCGA<br>CGCCAAGUJACGACUCCAACGCCGCUCCAUUCUUUGUCACC<br>AUCCACGCCUUGUUCUUAUCUUCUUCUCCAUUGAUAAAAACC<br>GACAACCACGACACCUUCGGCUUCAGUGCAGGACACAGUUGAUA<br>UGAGAAAAGAGGAUGAACGUAUGAAAACAUUUGAAAAUUGCCCG<br>UCAGUUUUCUAUCCGGAGAGCAACUUGCUCGAAAUGGAUU                                                  |
| 5   | <i>GFP</i>    | 200    | CCCUUAAAAUUUUAUUGCACUACUGGAAAACUACCUGUCCAUGG<br>CCAACACUUGUCACUACUUCUCUUAUGGUGUCAAUGCUIUUU<br>CAAGAUACCCAGAUCAUAUGAAGCGGCACGACUUCUUAAGAGC<br>GCCAUGCCUGAGGGAUACGUGCAGGAGAGGACCAUCUUCUUA<br>AGGACGACGGGAACUACAAGACACGU                                                                                                                                                                |
| 6   | <i>NbChlH</i> | 348    | UUGCCUCCAUAUACUCUGUGCUCUAAAGAACUAAAAAAGAUGGC<br>UACAACAUUGAGGGGCGGCCUGAGACUUCUGCGCAAUUGAUUG<br>AGAAGUAAUUCACGACAAAGAAGCUCAGUUCAGUAGCCCAAU<br>CUUAACAUAGCUUACAAGAUGAACGUUAGAGAAUACCAGAAGCUA<br>ACCCCUUAUGCUACUGCUCUUGAAGAGAACUGGGGGAAGCAC<br>CUGGUAAUUGAACUCUGAUGGAGAAAACCUCUUGGUUAUUGG<br>UAAACAGUAUGGUAAUGUCUUUAUCGGUGUUCAGCCCACAUUU<br>GGAUUAGAGGGUGACCCGAUGAGACUUCUGUUCUCCAAAUCAG |

Table 2: Primers used in the study

| Target         | Description                        | Primer sequences                                |
|----------------|------------------------------------|-------------------------------------------------|
| <i>SflAP</i>   | PCR for intact dsRNA amplification | CAATGGCTCCTCCTCAAC<br>AATCCATTTGAGCAAGTTGC      |
| <i>GFP</i>     | PCR for intact dsRNA amplification | CCCTTAAATTTATTTGCACTACT<br>ACGTGTCTTGTAGTTCCCG  |
| <i>NbGAPDH</i> | PCR loading control & qPCR         | CACTACCAACTGCCTTGAC<br>ATGAAGCAGCTCTTCCACCT     |
| <i>GFP</i>     | PCR - Probe design                 | GCACTACTGGAAAACCTG<br>CAACTTGTGGCCGAGGATG       |
| <i>SfRPL32</i> | qPCR                               | CCCGTCACATGCTACCCAATGG<br>CTCTACGATGGTCTTGCGT   |
| <i>SflAP</i>   | qPCR                               | CGCAGACTACGCAGTTTA<br>CGTCATGGTTCTCCAATCTT      |
| <i>NbChlH</i>  | qPCR                               | GGTATGACTGAGAAGAGGAAAG<br>GTTGGGTCTGAATCGAAGTAG |

# Supplementary figure 1

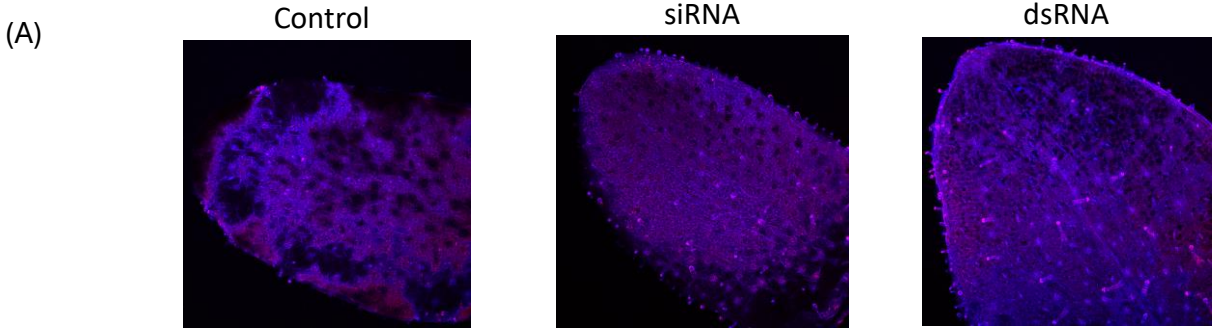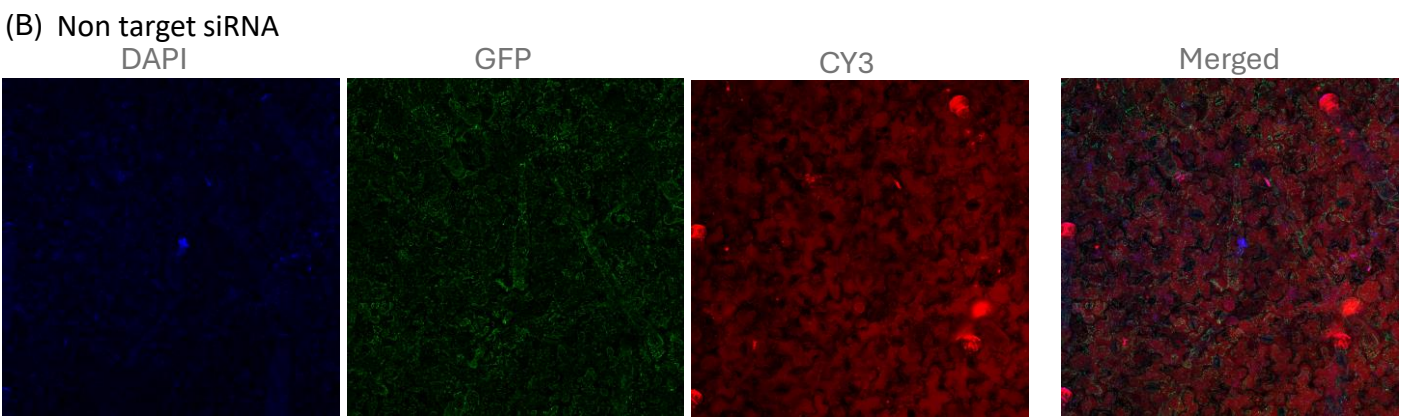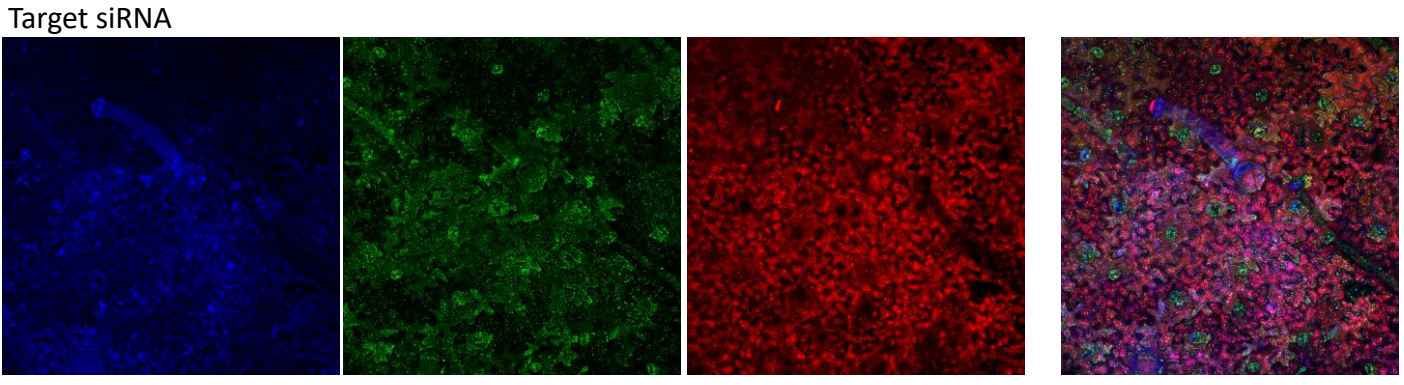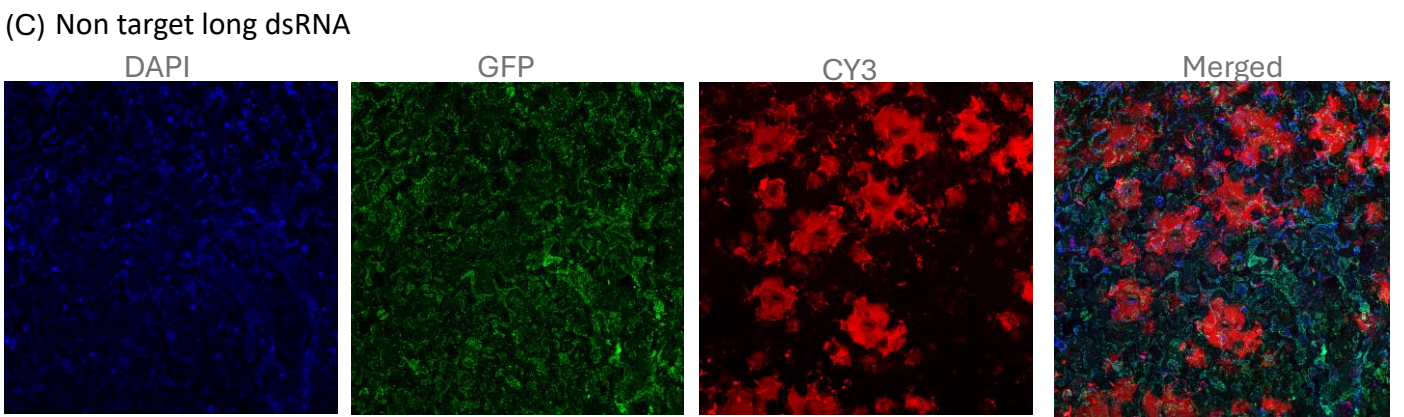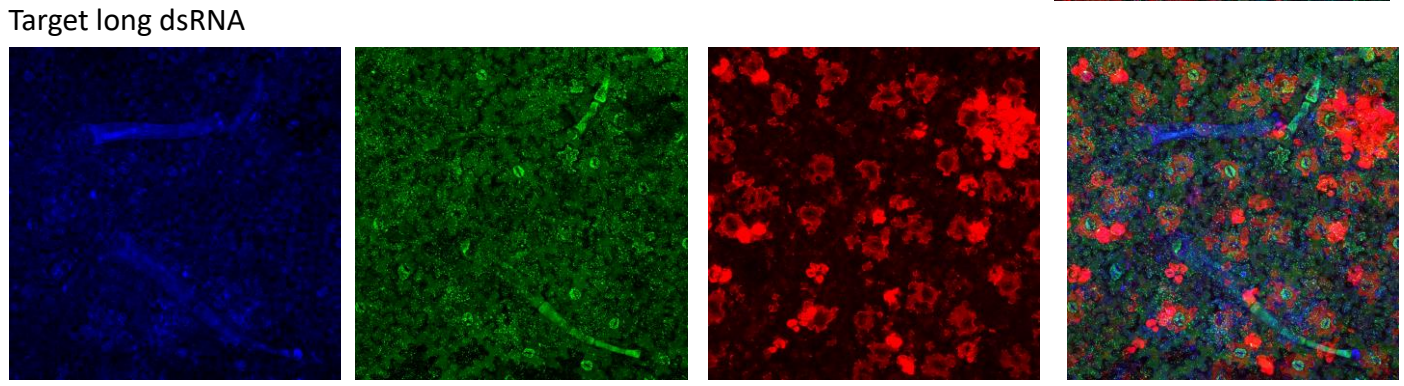

# Supplementary figure 2 (*ChlH* silencing at Week 11)

Week 11

Phenotype in mature leaf

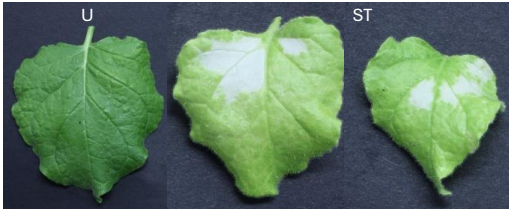

Phenotype in newly emerging leaf

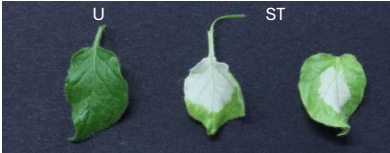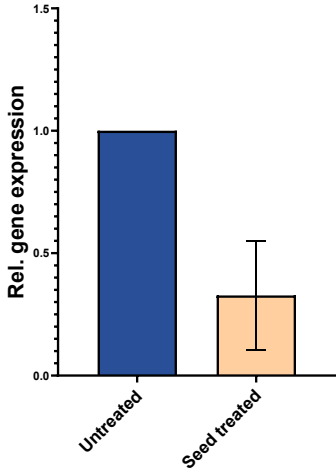

Supplement: Supplementary file 1 [file fd8e03e6ff07808edcd18b31.pdf]
